# Supplementary material
Source: PubMed Central journal article supplement (PMC4749486)
Supplement: 15_017_Drgonova_Suppl.pdf [file 15_017_Drgonova_Suppl.pdf]

Supplemental Data

Mouse Model for Protein Tyrosine Phosphatase D (*PTPRD*) Associations with Restless Leg Syndrome or Willis-Ekbom Disease and Addiction: Reduced Expression Alters Locomotion, Sleep Behaviors and Cocaine-Conditioned Place Preference

Jana Drgonova,<sup>1</sup> Donna Walther,<sup>1</sup> Katherine J Wang,<sup>1</sup> G Luke Hartstein,<sup>1</sup> Bryson Lochte,<sup>1</sup> Juan Troncoso,<sup>2</sup> Noriko Uetani,<sup>3</sup> Yoichiro Iwakura,<sup>4</sup> and George R Uhl<sup>1,5</sup>

Online address: <http://www.molmed.org>

The Feinstein Institute for Medical Research North Shore LIJ  
Empowering Imagination. Pioneering Discovery.®

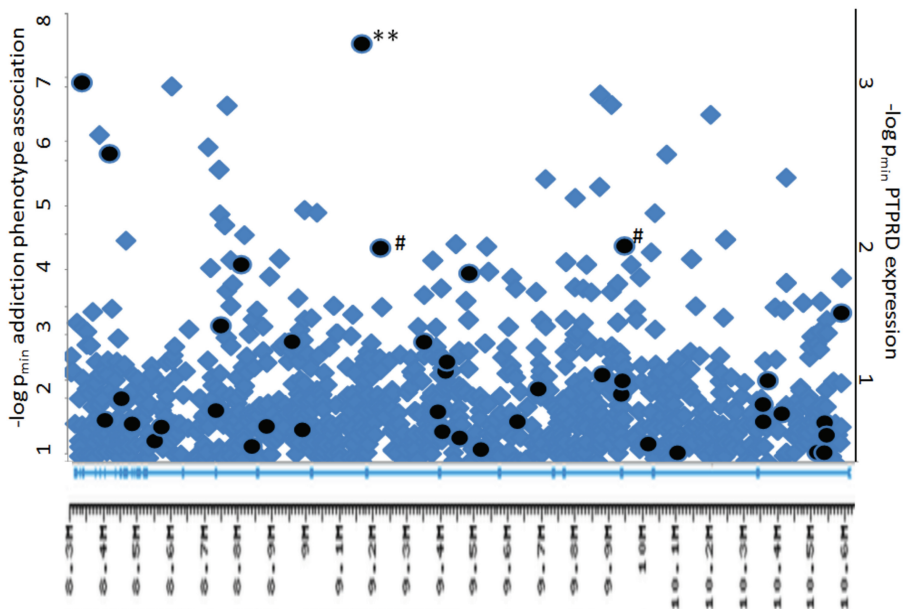

**Supplementary Figure S1.** Plots of  $-\log p_{\min}$  association with addiction -related phenotypes from samples noted above vs chromosomal distance at *PTPRD* locus, with *PTPRD* exons and chromosomal basepairs from Mapviewer (diamonds, left axis) and of  $-\log p$  values for association with level of *PTPRD* mRNA expression in human postmortem cerebral cortical samples (filled circles, right axis). #- RLS-associated SNPs. \*\* SNP with strongest association with *PTPRD* mRNA expression.

**Supplementary Table S1.** Data from which pmin association values are obtained.

Columns: rs\_id: SNP rs identifier; CHR: chromosome; position: bp (build 37) of SNP; pmin: lowest association p value for this SNP; strand: which chromosomal strand the gene/SNP is located on; allele\_a: the defined allele a for Affymetrix genotyping; allele\_b: the defined allele b for Affymetrix genotyping; nidaii\_aa\_P: p value for association with polysubstance dependence/use v controls with little use and no dependence (Af Am samples) (Drgon *et al.*, 2010); nidaii\_aa\_Phase: phase of association; nidaii\_ea\_P: p value for association with polysubstance dependence/use v controls with little use and no dependence (Eu Am samples) (Drgon *et al.*, 2010); nidaii\_ea\_Phase: phase of association; nida600k\_aa\_P: p value for association with polysubstance dependence/use v controls with little use and no dependence (Af Am samples) (Liu *et al.*, 2006); nida600k\_aa\_Phase: phase of association; nida600k\_ea\_P: p value for association with polysubstance dependence/use v controls with little use and no dependence (Eu Am samples) (Liu *et al.*, 2006); nida600k\_ea\_Phase: phase of association; jgida\_P: p value for association with methamphetamine dependence v controls with little use and no dependence (Japanese samples) (Uhl *et al.*, 2008); jgida\_Phase: phase of association; taiw\_P: p value for association with methamphetamine dependence v controls with little use and no dependence (Taiwanese samples) (Uhl *et al.*, 2008); taiw\_Phase: phase of association; hm\_dep\_P: p value for association with nicotine dependence (FTND) v controls with little use and no dependence (EuAm samples) (Johnson *et al.*, 2009); hm\_dep\_Phase: phase of dependence; eca\_P: p value for association with dependence on at least one addictive substance v controls with no abuse or dependence (EuAm samples) (Johnson *et al.*, 2009); eca\_Phase: phase of association; PS\_P: p value for association with dependence on any addictive substance v controls with little use and no dependence (EuAm samples) (Uhl *et al.*, 2014); PS\_Phase: phase of dependence; BRN\_P: p value for association with ability to quit smoking in a randomized controlled clinical trial (EuAm samples) (Uhl *et al.*, 2008); BRN\_Phase: phase of association; CNIII\_PVAL p value for association with ability to quit smoking in a randomized controlled clinical trial (EuAm samples) (Uhl *et al.*, 2014); CNIII\_Phase: phase of association; HM\_P: p value for association with ability to quit smoking in the community (former vs current smokers) (EuAm samples) (Johnson *et al.*, 2007); HM\_Phase: phase of association; LER\_P p value for association with ability to quit smoking in a randomized controlled clinical trial (EuAm samples) (Uhl *et al.*, 2008); LER\_Phase: phase of association; PIP\_P: p value for association with ability to quit smoking in a clinical setting (UK samples) (Uhl *et al.*, 2010); PIP\_Phase: phase of association; R1\_P: p value for association with ability to quit smoking in a randomized controlled clinical trial (EuAm samples) (Uhl *et al.*, 2007); ROSE2\_PVAL: p value for association with ability to quit smoking in a randomized controlled clinical trial (EuAm samples) (Uhl *et al.*, 2010); ROSE2\_Phase: phase of association; VEC\_P: p value for association with ability to quit smoking in a randomized controlled clinical trial (EuAm samples) (Drgon *et al.*, 2010); VEC\_Phase: phase of association; SAGE\_EA\_COC\_pval: p value for association with cocaine dependence v controls with little use and no dependence (Eu Am samples) (Drgon *et al.*, 2010); SAGE\_EA\_COC\_phase: phase of association; SAGE\_WH\_ALC\_pval: p value for association with alcohol dependence v controls with little use and no dependence (EuAm samples) (Drgon *et al.*, 2010); SAGE\_WH\_ALC\_phase: phase of association; SAGE\_AA\_COC\_pval p value for association with cocaine dependence v controls with little use and no dependence (Af Am samples) (Drgon *et al.*, 2010); SAGE\_AA\_COC\_phase: phase of association; SAGE\_BL\_ALC\_pval p value for association with alcohol dependence v controls with little use and no dependence (Af Am samples) (Drgon *et al.*, 2010); SAGE\_BL\_ALC\_phase: phase of association; Treut\_pval: p value for association with alcohol dependence v controls with little use and no dependence (German samples) (Treutlein *et al.*, 2009, kindly provided by M Reitschul); Treut\_phase: phase of association. lmnStrand: Strand assessed in Immulina assays (SAGE). ACTG: base.

| rs_id     | CHR | position | p_min       | strand | allele_a | allele_b | nidaii_aa_P | nidaii_ea_P | nida600k_aa_P | nida600k_ea_P | jgida_P     | taiw_P | hm_dep_P    | eca_P | PS_P        | PS_Phase | BRN_P       | CNIII_PVAL | HM_P        | HM_Phase | LER_P       | Lerman_Phase | PIP_P   | R1_P | ROSE2_PVAL  | VEC_P | SAGE_EA_COC_pval | SAGE_EA_COC_phase | SAGE_WH_ALC_pval | SAGE_WH_ALC_phase | SAGE_AA_COC_pval | SAGE_AA_COC_phase | SAGE_BL_ALC_pval | SAGE_BL_ALC_phase | Treut_pval | lmnStrand   | ACTG        |   |             |   |        |   |             |   |             |   |  |     |       |  |  |  |  |  |
|-----------|-----|----------|-------------|--------|----------|----------|-------------|-------------|---------------|---------------|-------------|--------|-------------|-------|-------------|----------|-------------|------------|-------------|----------|-------------|--------------|---------|------|-------------|-------|------------------|-------------------|------------------|-------------------|------------------|-------------------|------------------|-------------------|------------|-------------|-------------|---|-------------|---|--------|---|-------------|---|-------------|---|--|-----|-------|--|--|--|--|--|
| rs7872830 | 9   | 8274789  | 0.003988095 | -      | A        | G        | 0.966996466 | A           | 0.347611788   | A             | 0.966736473 | A      | 0.217613045 | B     | 0.923838402 | A        | 0.448319119 | A          | 0.873378308 | B        | 0.236939945 | A            | 0.01133 | B    | 0.495982219 | A     | 0.758700013      | B                 | 0.758268983      | B                 | 0.056335509      | B                 | 0.003988095      | 0.103562452       | B          | 0.818000019 | 0.863741191 | B | 0.279300004 | T | 0.3565 | T | 0.987600029 | G | 0.594900012 | G |  | Top | (A/C) |  |  |  |  |  |
| rs7872172 | 9   | 8274965  | 0.002235398 | -      | A        | T        |             |             |               |               |             |        |             |       |             |          |             |            |             |          |             |              |         |      |             |       |                  |                   |                  |                   |                  |                   |                  |                   |            |             |             |   |             |   |        |   |             |   |             |   |  |     |       |  |  |  |  |  |

Supplementary Table S1. Continued.

Table with columns: rs\_id, CHR, position, P\_val, strand, allele\_a, allele\_b, and numerous other variant-related fields including strand, phase, and recombination rates.

Continued on next page





Supplementary Table S1. Continued.

Table with columns: rs\_id, CHR, position, P\_min, strand, allele\_a, allele\_b, nidal, nidal\_ac\_P, nidal\_ac\_Phase, nidal\_ac\_Phase, nidal\_ac\_Phase, nidal\_ac\_Phase, jgld\_a, jgld\_a\_Phase, talw\_P, talw\_Phase, hm\_dep\_P, hm\_dep\_Phase, eoa\_P, eoa\_Phase, PS\_P, PS\_Phase, BRN\_P, BRN\_Phase, CNIL\_PVAL, CNIL\_Phase, HM\_P, HM\_Phase, LER\_P, LER\_Phase, Lemman\_Phase, PIP\_P, PIP\_Phase, RI\_P, RI\_Phase, rose\_phase, ROSE2\_PVAL, ROSE2\_Phase, VEC\_P, VEC\_Phase, SAGE\_EA\_COX\_pval, SAGE\_EA\_COX\_phase, SAGE\_WHL\_ALC\_pval, SAGE\_WHL\_ALC\_phase, SAGE\_AA\_COX\_pval, SAGE\_AA\_COX\_phase, SAGE\_BB\_ALC\_pval, SAGE\_BB\_ALC\_phase, TruT\_pval, TruT\_phase, ltrmstrand, ACTG.

Continued on next page















































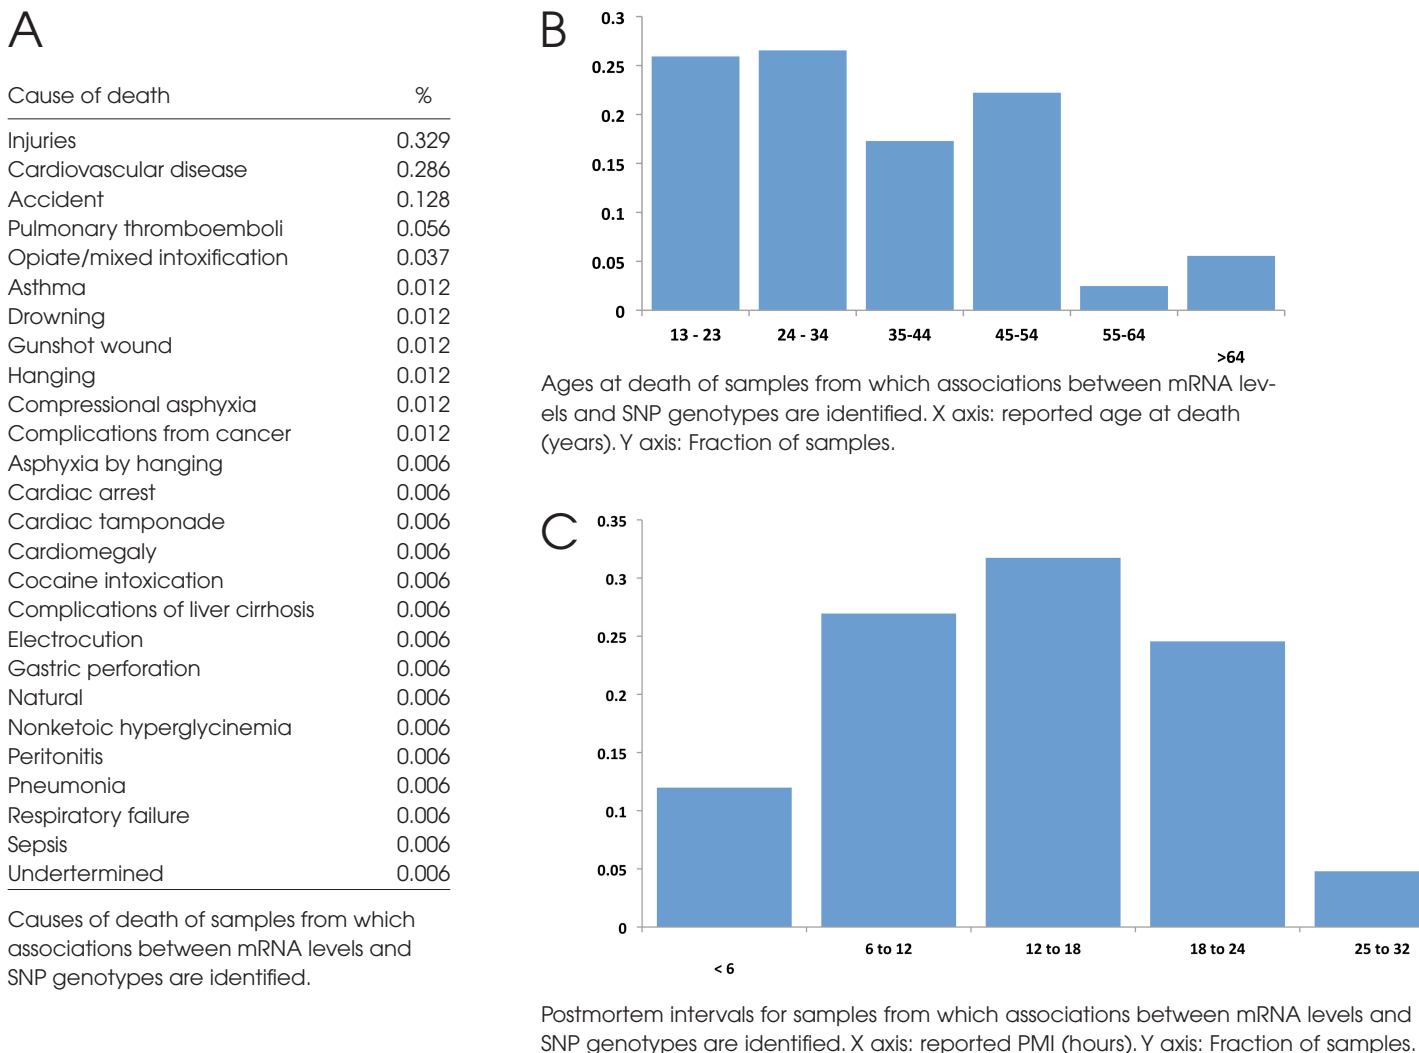

**Supplementary Figure S2.** Causes of death (A), ages of death (B) and postmortem intervals (C) for samples used for study of PTPRD mRNA expression levels in individuals with different PTPRD haplotype.
